# Supplementary material for: Retracted Article: Long noncoding RNA DLEU1 promotes cell proliferation and migration of Wilms tumor through the miR-300/HOXC8 axis
Source: Royal Society of Chemistry journal article supplement (doi:10.1039/c9ra07215b), 2019-01-01

**Supplementary Figure 1.** The effects of DLEU1 knockdown on HK-2 cells. HK-2 cells were transfected with si-NC or si-DLEU1, respectively. (A) Cell proliferation was detected by MTT assay. (B and C) Cell migration and invasion were determined using transwell assay.

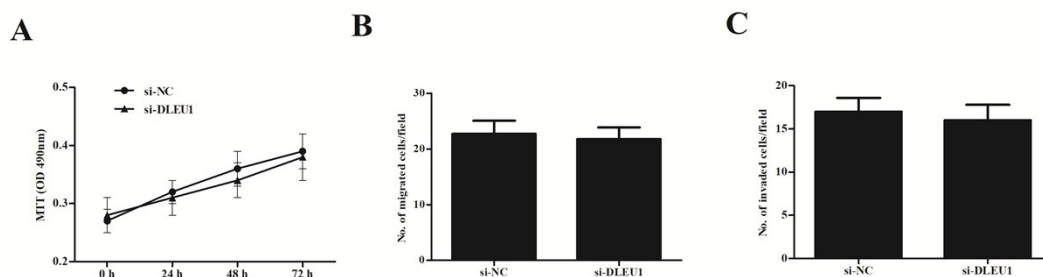

**Supplementary Figure 2.** The effects of DLEU1 on GHINK-1 cells by overexpressing miR-300 mimics. GHINK-1 cells were co-transfected with over-DLEU1 and miR-300 mimics. (A) Cell proliferation was detected by MTT assay. (B and C) Cell migration and invasion were determined using transwell assay. \* $p < 0.05$  vs. vector+miR-NC group; # $p < 0.05$  vs. over-DLEU1+miR-NC group.

**A**

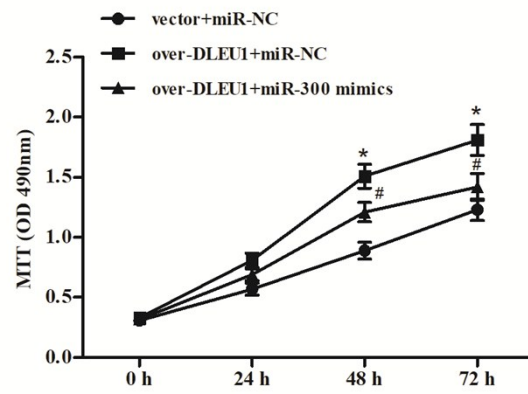

**B**

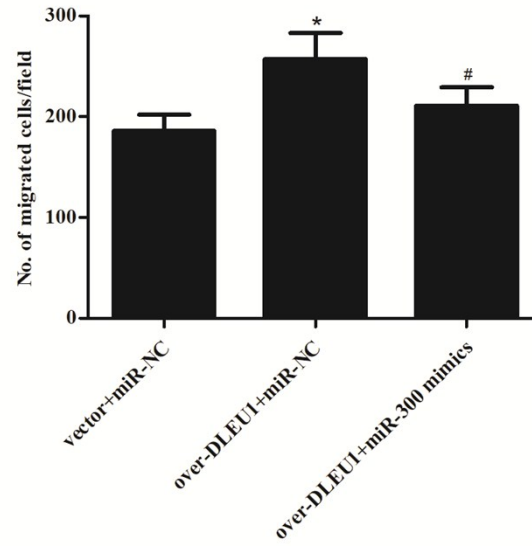

**C**

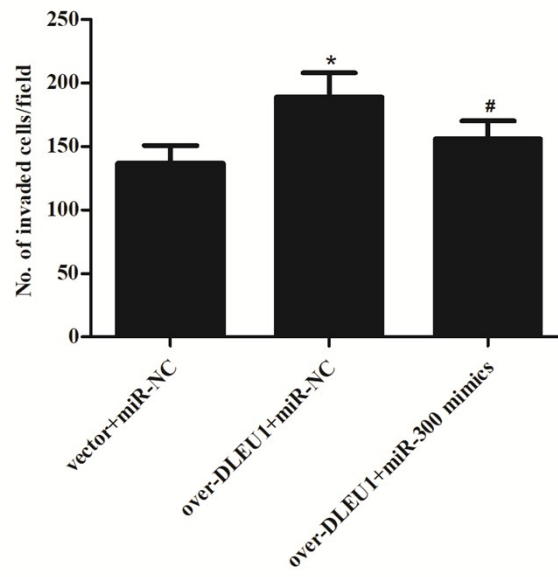

Supplement: c9ra07215b1.pdf [file c9ra07215b1.pdf]
